# Supplementary material for: Computational evaluation of TIS annotation for prokaryotic genomes
Source: Springer Nature journal article supplement (doi:10.1186/1471-2105-9-160), 2008-03-25
Supplement: 12859_2007_2145_MOESM1_ESM.pdf [file 12859_2007_2145_MOESM1_ESM.pdf]

## Contents

|   |                                                                                       |   |
|---|---------------------------------------------------------------------------------------|---|
| 1 | Calculating the variance of $\varepsilon$                                             | 1 |
| 2 | Minimizing the weighted sum of squared errors $\varepsilon'^T \Sigma' - \varepsilon'$ | 3 |

## 1 Calculating the variance of $\varepsilon$

The set  $\mathbb{O}$  is a mixture of three types of TISs  $\mathbb{T}$ ,  $\mathbb{F}_u$  and  $\mathbb{F}_d$ , we have

$$\hat{W}_{\mathbb{O}}^{(\mathbb{O})} = \alpha_{\mathbb{T}} \hat{W}_{\mathbb{T}}^{(\mathbb{O})} + \alpha_{\mathbb{F}_u} \hat{W}_{\mathbb{F}_u}^{(\mathbb{O})} + \alpha_{\mathbb{F}_d} \hat{W}_{\mathbb{F}_d}^{(\mathbb{O})}, \quad (1)$$

where the superscript  $(\mathbb{O})$  refers to PWMs obtained from the set  $\mathbb{O}$  and three PWMs  $\hat{W}_{\mathbb{T}}^{(\mathbb{O})}$ ,  $\hat{W}_{\mathbb{F}_u}^{(\mathbb{O})}$  and  $\hat{W}_{\mathbb{F}_d}^{(\mathbb{O})}$  are virtually calculated from the three types of TISs in the set  $\mathbb{O}$ . Since we don't know these three PWMs, we use three other PWMs obtained from the set  $\mathbb{I}$  to replace them, and an error  $\varepsilon$  is generated

$$\hat{W}_{\mathbb{O}}^{(\mathbb{O})} = \alpha_{\mathbb{T}} \hat{W}_{\mathbb{T}}^{(\mathbb{I})} + \alpha_{\mathbb{F}_u} \hat{W}_{\mathbb{F}_u}^{(\mathbb{I})} + \alpha_{\mathbb{F}_d} \hat{W}_{\mathbb{F}_d}^{(\mathbb{I})} + \varepsilon, \quad (2)$$

Here we arrange the  $4 \times (l+r)$  matrices in row order to  $4(l+r)$ -dimension vectors. Consequently,  $W_j(\mu)$  (in main text) becomes  $W(4(j-1) + \mu)$ ,  $j = 1, 2, \dots, l+r$  and  $\mu = 1, 2, 3, 4$ .

Thus the error term  $\varepsilon$  can be explicitly written as

$$\varepsilon = \sum_{i=1}^3 \alpha_i (\hat{W}_i^{(\mathbb{O})} - \hat{W}_i^{(\mathbb{I})}), \quad (3)$$

where the index  $i=1,2,3$  refer to the three sets  $\mathbb{T}$ ,  $\mathbb{F}_u$  and  $\mathbb{F}_d$ , respectively. The ‘‘homogeneity assumption’’ (see the paper) says that  $\hat{W}_i^{(\mathbb{O})}$  and  $\hat{W}_i^{(\mathbb{I})}$  are independent finite-sample estimations of the same PWM  $W_i$ . Therefore,

$$E(\varepsilon) = \sum_i \alpha_i (E(\hat{W}_i^{(\mathbb{O})}) - E(\hat{W}_i^{(\mathbb{I})})) = \sum_i \alpha_i (W_i - W_i) = 0, \quad (4)$$

and the variance of  $\varepsilon$  can be written as

$$Var(\varepsilon) = \sum_i \alpha_i^2 (Var(\hat{W}_i^{(\mathbb{O})}) + Var(\hat{W}_i^{(\mathbb{I})})). \quad (5)$$

We further assume that the nucleotide frequencies at different positions in the PWM are independent (Staden, R. (1984) Computer methods to locate signals in nucleic acid sequences. *Nucleic Acids Res*, **12** :505-519). Thus, for position  $j$  and position  $k$  (where  $j, k=1, 2, \dots, l+r$ ), we have

$$\begin{aligned} & Cov(\hat{W}_i^{(\mathbb{O})}(4(j-1) + \mu), \hat{W}_i^{(\mathbb{O})}(4(k-1) + \nu)) \\ &= \frac{W_i(4(j-1) + \mu)\delta_{\mu,\nu} - W_i(4(j-1) + \mu)W_i(4(k-1) + \nu)}{\alpha_i \Omega_{\mathbb{O}}} \delta_{j,k} \end{aligned} \quad (6)$$

and

$$\begin{aligned} & Cov(\hat{W}_i^{(\mathbb{I})}(4(j-1)+\mu), \hat{W}_i^{(\mathbb{I})}(4(k-1)+\nu)) \\ &= \frac{W_i(4(j-1)+\mu)\delta_{\mu,\nu} - W_i(4(j-1)+\mu)W_i(4(k-1)+\nu)}{\Omega_i} \delta_{j,k}, \end{aligned} \quad (7)$$

where  $\mu, \nu=1, 2, 3, 4$ , denoting nucleotide A, C, G, T, respectively. This yields

$$Var(\hat{W}_i^{(\mathbb{O})}) = \frac{1}{\alpha_i \Omega_{\mathbb{O}}} \Sigma_i \quad (8)$$

and

$$Var(\hat{W}_i^{(\mathbb{I})}) = \frac{1}{\Omega_i} \Sigma_i, \quad (9)$$

where  $\Sigma_i$  is a block diagonal symmetric matrix and the number of blocks is determined by the number of positions of the PWM alignment. An block according to position  $j$  is shown as below:

$$\begin{pmatrix} W_i(4j-3) - W_i^2(4j-3) & -W_i(4j-3)W_i(4j-2) & -W_i(4j-3)W_i(4j-1) & -W_i(4j-3)W_i(4j) \\ \cdot & W_i(4j-2) - W_i^2(4j-2) & -W_i(4j-2)W_i(4j-1) & -W_i(4j-2)W_i(4j) \\ \cdot & \cdot & W_i(4j-1) - W_i^2(4j-1) & -W_i(4j-1)W_i(4j) \\ \cdot & \cdot & \cdot & W_i(4j) - W_i^2(4j) \end{pmatrix}.$$

With Eq. 5, Eq. 8 and Eq. 9, we finally obtain the variance of  $\varepsilon$

$$Var(\varepsilon) = \sum_i \left( \frac{\alpha_i^2}{\Omega_i} + \frac{\alpha_i}{\Omega_{\mathbb{O}}} \right) \Sigma_i \quad (10)$$

Then we reduce data redundancy in the PWM to make  $Var(\varepsilon)$  full rank with a Z-transformation as below (Zhang, C.T. and Zhang, R. (1991) Analysis of distribution of bases in the coding sequences by a diagrammatic technique. *Nucleic Acids Res*, **19** :6313-6317)

$$\begin{cases} V(3j-2) = W(4j-3) + W(4j-2) - W(4j-1) - W(4j) \\ V(3j-1) = W(4j-3) - W(4j-2) + W(4j-1) - W(4j) \\ V(3j) = W(4j-3) - W(4j-2) - W(4j-1) + W(4j). \end{cases}$$

Consequently,

$$\hat{V}_{\mathbb{O}} = \sum_i \alpha_i \hat{V}_i + \varepsilon'. \quad (11)$$

The variance of  $\varepsilon'$  has a similar form with  $\varepsilon$

$$Var(\varepsilon') = \sum_i \left( \frac{\alpha_i^2}{\Omega_i} + \frac{\alpha_i}{\Omega_{\mathbb{O}}} \right) \Sigma'_i, \quad (12)$$

where  $\Sigma'_i = H\Sigma_iH^T$  and  $H$  is a block diagonal matrix with each block being

$$\begin{pmatrix} 1 & 1 & -1 & -1 \\ 1 & -1 & 1 & -1 \\ 1 & -1 & -1 & 1 \end{pmatrix}.$$

$\hat{W}_i$  is used as an estimate of  $W_i$  to calculate  $\Sigma'_i$ . The effect of this approximation is of high order in our model if the samples are sufficient, for example over 50. In the following part,  $Var(\varepsilon')$  will be denoted by  $\Sigma'$  for convenience.

## 2 Minimizing the weighted sum of squared errors $\varepsilon'^T \Sigma'^{-1} \varepsilon'$

In the main text we mentioned that  $\alpha$  is estimated by minimizing the weighted sum of square errors

$$f(\alpha_1, \alpha_2, \alpha_3) = (\hat{V}_0 - \sum_{i=1}^3 \alpha_i \hat{V}_i)^T \Sigma'^{-1} (\hat{V}_0 - \sum_{i=1}^3 \alpha_i \hat{V}_i) \quad (13)$$

, where the index  $i=1,2,3$  refer to the three sets  $\mathbb{T}$ ,  $\mathbb{F}_u$  and  $\mathbb{F}_d$  respectively.

Substitute  $\alpha_3$  with

$$\alpha_3 = 1 - \sum_{i=1}^2 \alpha_i \quad (14)$$

and Eq. 13 can be written as

$$f(\alpha_1, \alpha_2) = (S - \sum_{i=1}^2 \alpha_i T_i)^T \Sigma'^{-1} (S - \sum_{i=1}^2 \alpha_i T_i) \quad (15)$$

where

$$S = \hat{V}_0 - \hat{V}_3 \quad (16)$$

and

$$T_i = \hat{V}_i - \hat{V}_3, \quad i = 1, 2 \quad (17)$$

To minimize  $f(\alpha_1, \alpha_2)$ , we let the partial derivatives be zero

$$\frac{\partial f}{\partial \alpha_j} = -2T_j^T \Sigma'^{-1} (S - \sum_{i=1}^2 \alpha_i T_i) - (S - \sum_{i=1}^2 \alpha_i T_i)^T \Sigma'^{-1} \frac{\partial \Sigma}{\partial \alpha_j} \Sigma'^{-1} (S - \sum_{i=1}^2 \alpha_i T_i) = 0 \quad (18)$$

Eq. 18 can be simplified to

$$\sum_{i=1}^2 K_{ij} \alpha_i = L_j, \quad j = 1, 2 \quad (19)$$

where

$$K_{ij} = T_j^T \Sigma'^{-1} T_i, \quad i, j = 1, 2 \quad (20)$$

and

$$L_j = T_j^T \Sigma' S + \frac{1}{2} (S - \sum_{i=1}^2 \alpha_i T_i)^T \Sigma' \frac{\partial \Sigma'}{\partial \alpha_j} \Sigma' (S - \sum_{i=1}^2 \alpha_i T_i), \quad j = 1, 2 \quad (21)$$

There are 2 equations and 2 variables. The equations can be solved iteratively. First we set

$$\alpha_i^{(0)} = 1/3, i = 1, 2 \quad (22)$$

Then we calculate  $\Sigma'^{(0)}$  and  $\partial \Sigma'^{(0)} / \partial \alpha_j$  by Eq. 12,  $K_{ij}^{(0)}$  and  $L_j^{(0)}$  by Eq. 20 and Eq. 21, and then obtain  $\alpha^{(1)}$  by solving

$$\sum_{i=1}^2 K_{ij}^{(0)} \alpha_i^{(1)} = L_j^{(0)}, \quad j = 1, 2 \quad (23)$$

Then  $\alpha_i^{(1)}$  is used to calculate  $\alpha_i^{(2)}$  and the process is repeated until  $\sum_{i=1}^2 |\alpha_i^{(n)} - \alpha_i^{(n-1)}| < 10^{-6}$ .

It's difficult to prove that this iteration process will always converge, but in practice it converges quite fast. For instance, when to estimate the accuracy of RefSeq annotation for *E. coli* K12, the algorithm converge in less than 10 steps (Fig. 1); we also show the iteration process of another 12 randomly selected genomes in Fig. 2.

[Fig. 1 about here.]

[Fig. 2 about here.]

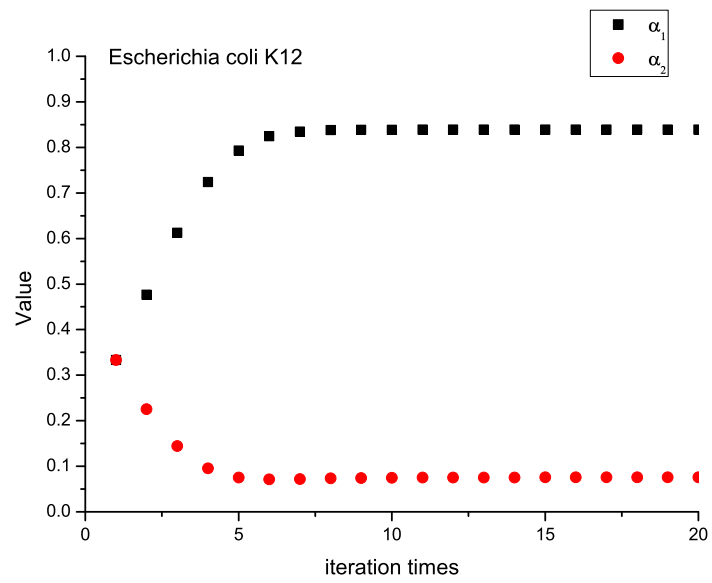

Fig. 1. The convergency of the optimization algorithm (shown on *E. coli* K12).

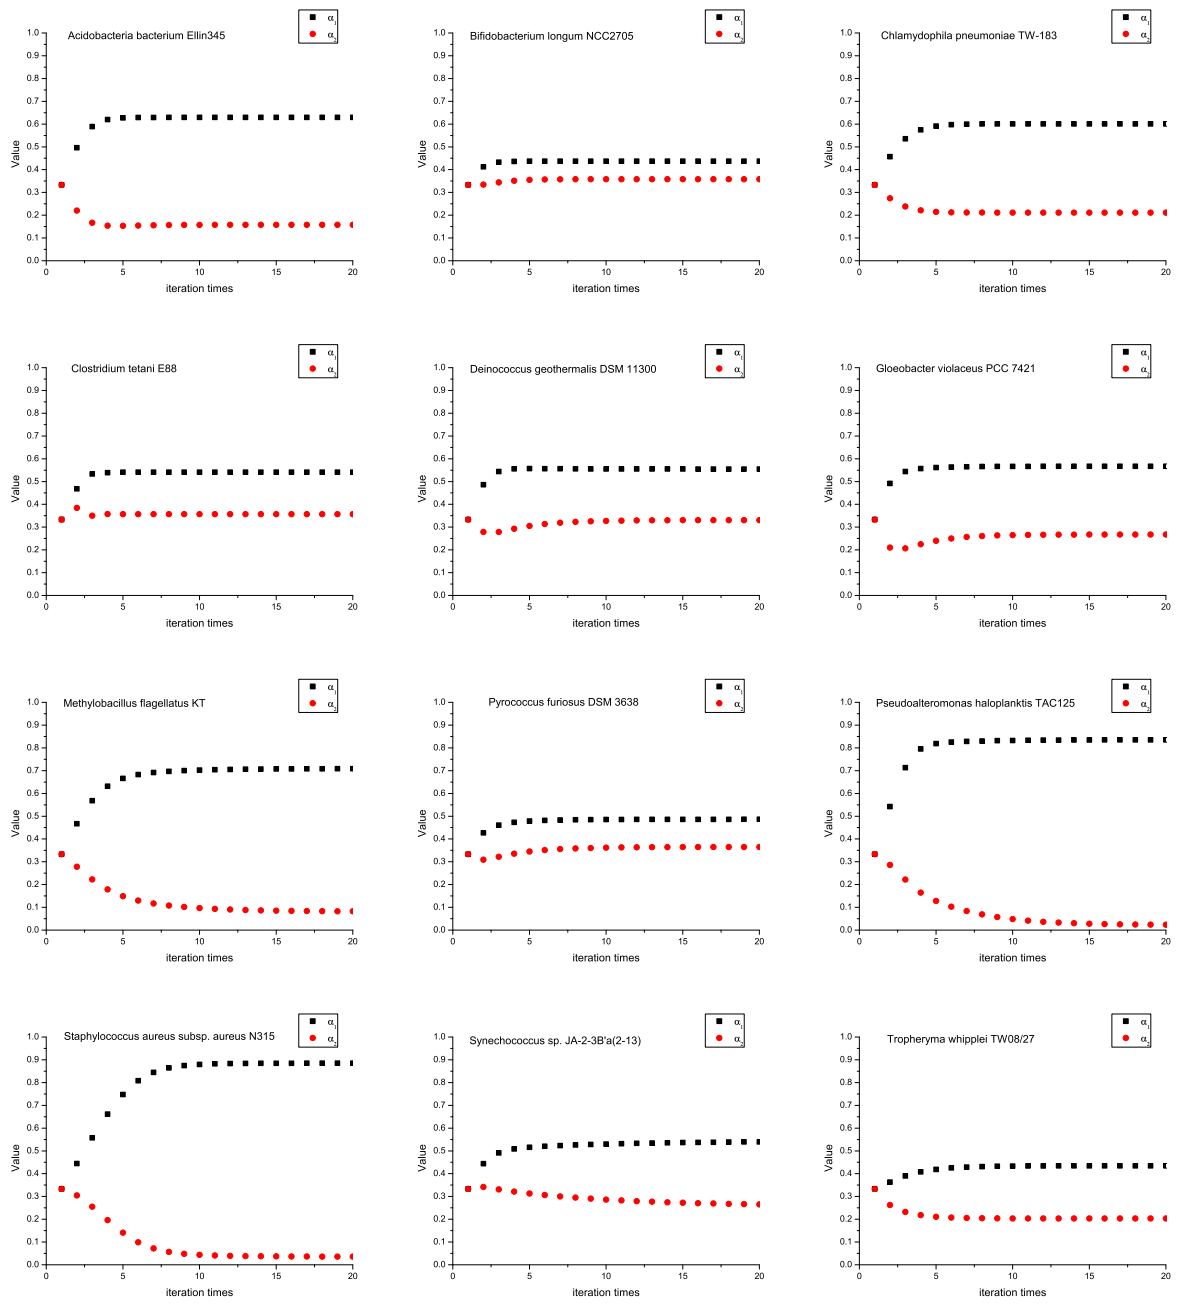

Fig. 2. The convergency of the optimization algorithm (shown on 12 randomly selected genomes).
