# Supplementary material for: Computational evaluation of TIS annotation for prokaryotic genomes
Source: Springer Nature journal article supplement (doi:10.1186/1471-2105-9-160), 2008-03-25

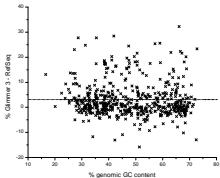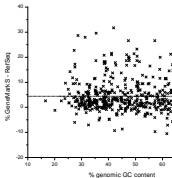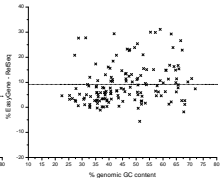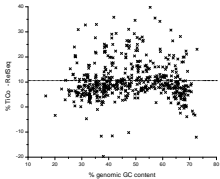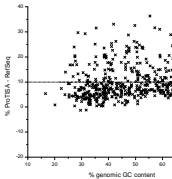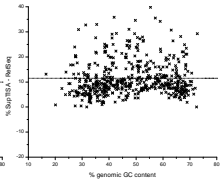

Supplement: 12859_2007_2145_MOESM9_ESM.pdf [file 12859_2007_2145_MOESM9_ESM.pdf]
